# Supplementary material for: Influence of Ideational Praxis on the Development of Play and Adaptive Behavior of Children with Autism Spectrum Disorder: A Comparative Analysis
Source: MDPI journal article supplement (doi:10.3390/ijerph18115704), 2021-05-26
Supplement: s1 [file s1]

**Table S1.** Multiple regression of the TIP and demographic variables in ABAS-II

|                              | CGA                         |          |                 | Conceptual domain          |          |                 | Social domain               |          |                 | Practical domain           |          |                 |
|------------------------------|-----------------------------|----------|-----------------|----------------------------|----------|-----------------|-----------------------------|----------|-----------------|----------------------------|----------|-----------------|
|                              | $\beta$ (SE)                | <i>t</i> | <i>p</i> -value | $\beta$ (SE)               | <i>t</i> | <i>p</i> -value | $\beta$ (SE)                | <i>t</i> | <i>p</i> -value | $\beta$ (SE)               | <i>t</i> | <i>p</i> -value |
| <b>Sex (males vs femles)</b> | 4.21 (5.29)                 | 0.80     | 0.43            | 3.28 (5.53)                | 0.59     | 0.55            | 4.57 (5.50)                 | 0.83     | 0.41            | 3.26 (5.72)                | 0.57     | 0.57            |
| <b>Age</b>                   | 1.71 (2.86)                 | 0.60     | 0.55            | -0.58 (2.99)               | -0.19    | 0.84            | 1.96 (2.97)                 | 0.66     | 0.51            | 1.86 (3.09)                | 0.60     | 0.55            |
| <b>Diagnosis (TD vs ASD)</b> | -30.46 (5.27)               | -5.79    | < 0.00          | -25.57 (5.51)              | -4.64    | < 0.00          | -31.09 (5.48)               | -5.68    | < 0.00          | -27.08 (5.70)              | -4.75    | < 0.00          |
| <b>TIP</b>                   | 2.09 (1.18)                 | 1.77     | 0.08            | 1.34 (1.24)                | 1.09     | 0.28            | 2.27 (1.23)                 | 1.85     | 0.07            | 2.33 (1.28)                | 1.82     | 0.07            |
| <b>R<sup>2</sup> (%)</b>     | 54.7                        |          |                 | 40.6                       |          |                 | 54.2                        |          |                 | 46.3                       |          |                 |
| <b>Model</b>                 | $F(4.35) = 12.77. p < 0.00$ |          |                 | $F(4.35) = 7.66. p < 0.00$ |          |                 | $F(4.35) = 12.53. p < 0.00$ |          |                 | $F(4.35) = 9.42. p < 0.00$ |          |                 |

GAC: General adaptive composite; TIP: Test of ideational praxis; ASD: autism spectrum disorder;  $\beta$ : regression coefficient. SE: standard error
